# Supplementary material for: Effect of febuxostat on the level of malondialdehyde‐modified low‐density lipoprotein, an oxidative stress marker: A subanalysis of the PRIZE study
Source: PubMed Central journal article supplement (PMC10270262; doi:10.1002/clc.24014), 2023-03-29
Supplement: CLC-46-698-s001.pdf [file CLC-46-698-s001.pdf]

**Table S1.** MDA-LDL levels, LDL-C levels, and MDA-LDL/LDL-C ratios at baseline and 24M

|                            | <b>Control group</b> | <b>No.</b> | <b>Febuxostat group</b> | <b>No.</b> |
|----------------------------|----------------------|------------|-------------------------|------------|
| <b>MDA-LDL</b>             |                      |            |                         |            |
| Baseline                   | 109 (85, 137)        | 183        | 108 (89, 133)           | 200        |
| 24M                        | 106 (80, 132)        | 183        | 102 (77, 130)           | 200        |
| <b>LDL-C</b>               |                      |            |                         |            |
| Baseline                   | 109 97 (75, 120)     | 168        | 100 (79, 120)           | 190        |
| 24M                        | 91 (71, 113)         | 168        | 95 (72, 119)            | 190        |
| <b>MDA-LDL/LDL-C ratio</b> |                      |            |                         |            |
| Baseline                   | 1.14 (0.96, 1.48)    | 168        | 1.10 (0.90, 1.39)       | 190        |
| 24M                        | 1.13 (0.92, 1.43)    | 168        | 1.07 (0.90, 1.33)       | 190        |

Values are expressed as medians and interquartile ranges. Abbreviations: LDL-C, low-density lipoprotein cholesterol; M, month; MDA-LDL, malondialdehyde-modified low-density lipoprotein; No., number.

**Figure S1.** Association between the change in UA and estimated changes in the (A) MDA-LDL level, (B) LDL-C level, and (C) MDA-LDL/LDL-C ratio.

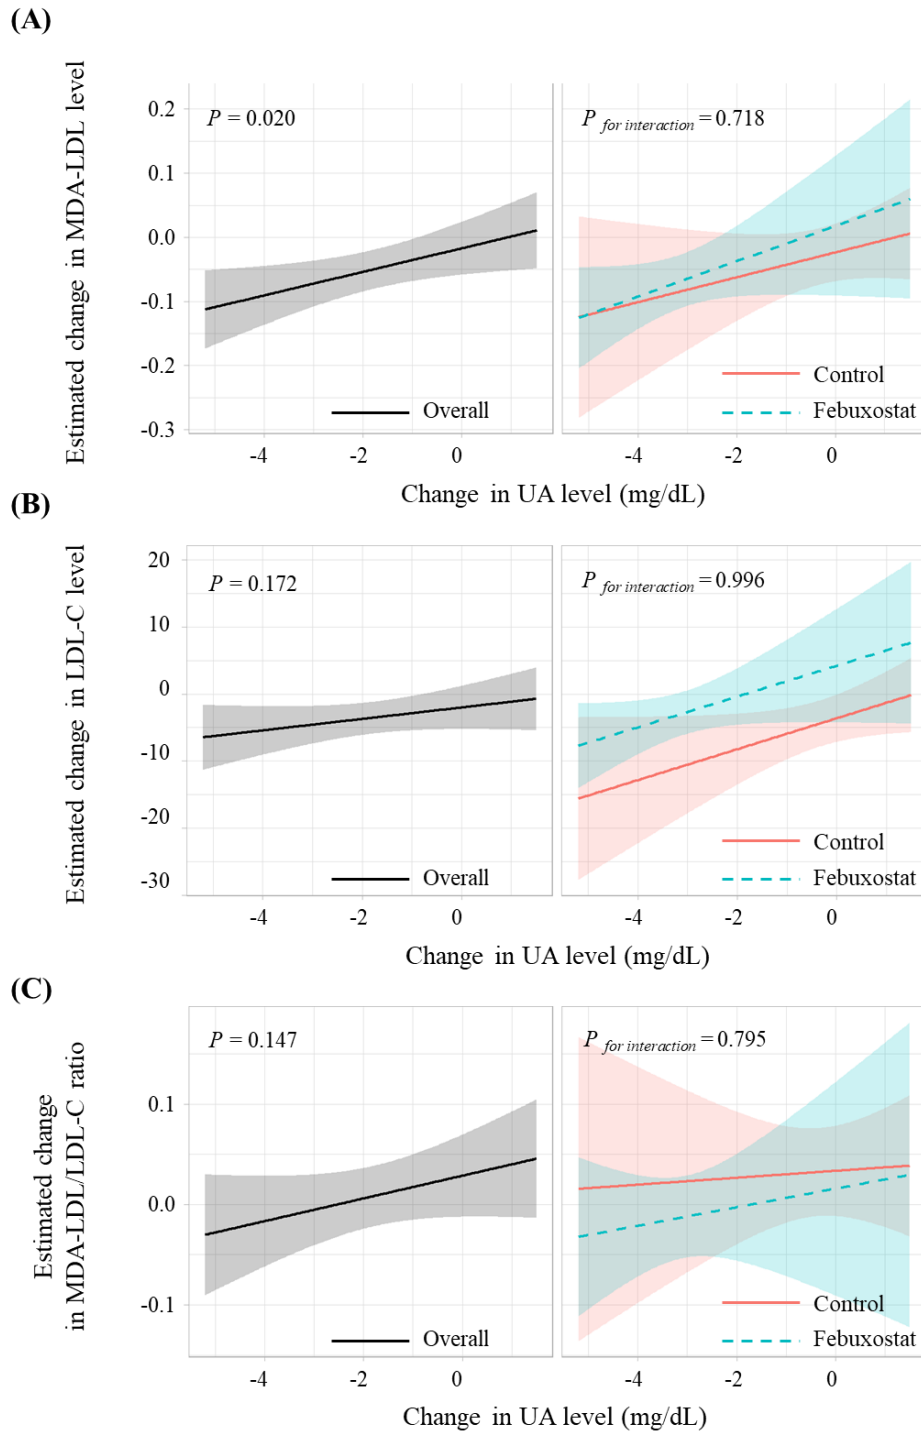

Overall population (left panels) and by treatment groups (right panels).

LDL-C, low-density lipoprotein cholesterol; MDA-LDL, malondialdehyde-modified low-density lipoprotein; UA, uric acid.

**Figure S2.** Association between the estimated change in mean CCA-IMT and the estimated changes in the (A) MDA-LDL level, (B) LDL-C level, and (C) MDA-LDL/LDL-C ratio.

(A)

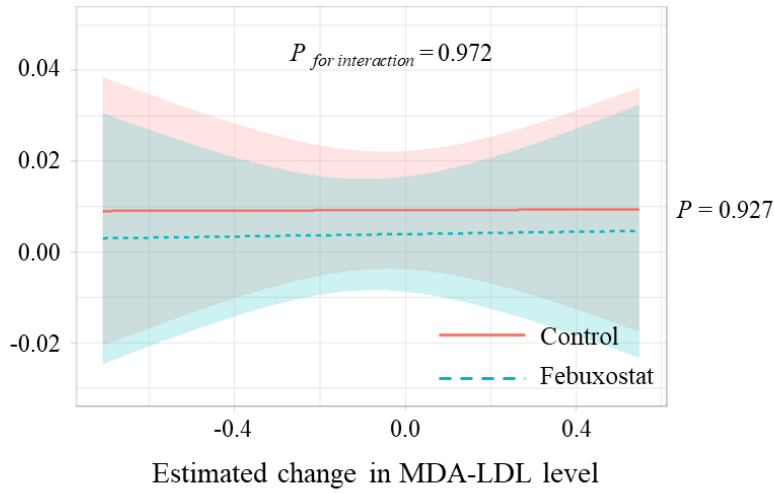

(B)

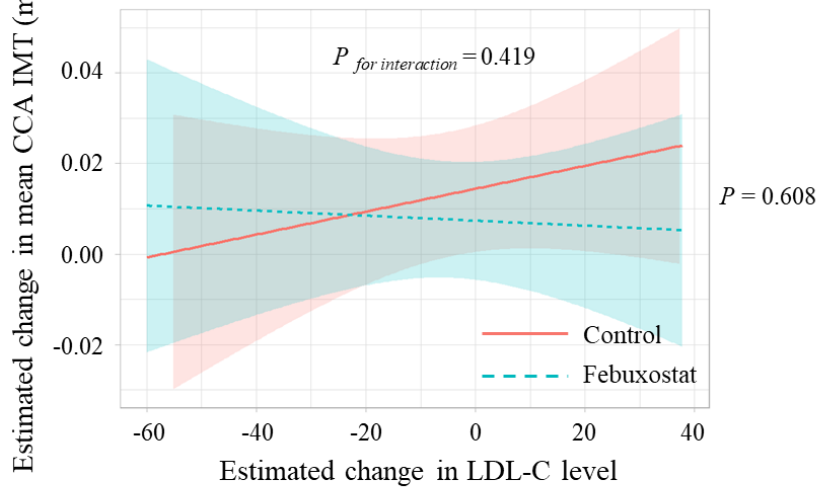

(C)

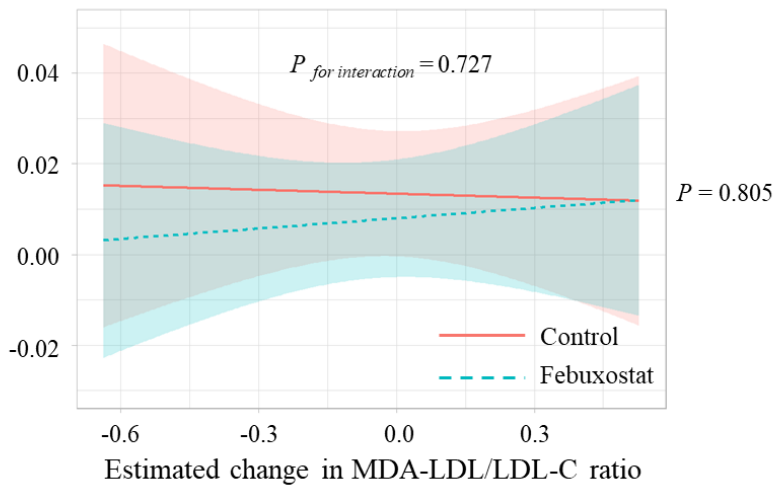

*P* values, shown to the right of each figure, indicate the relationship between the estimated changes in CCA-IMT and those in MDA-LDL level, LDL-C level, and MDA-LDL/LDL-C ratio in the overall population. *P* *for interaction*, shown in the center of each figure, indicates a between-group difference in the relationships between the estimated change in CCA-IMT and those in MDA-LDL level, LDL-C level, and MDA-LDL/LDL-C ratio.

CCA, common carotid artery; IMT, intima-media thickness; LDL-C, low-density lipoprotein cholesterol; MDA-LDL, malondialdehyde-modified low-density lipoprotein.
